# Supplementary material for: Rapid and visual detection of heparin based on the disassembly of polyelectrolyte-induced pyrene excimers
Source: Royal Society of Chemistry journal article supplement (doi:10.1039/c7ob00115k), 2017-01-01
Supplement: c7ob00115k1.pdf [file c7ob00115k1.pdf]

Supplementary information for

**Rapid and visual detection of heparin based on disassembly of  
polyelectrolyte-induced pyrene excimers**

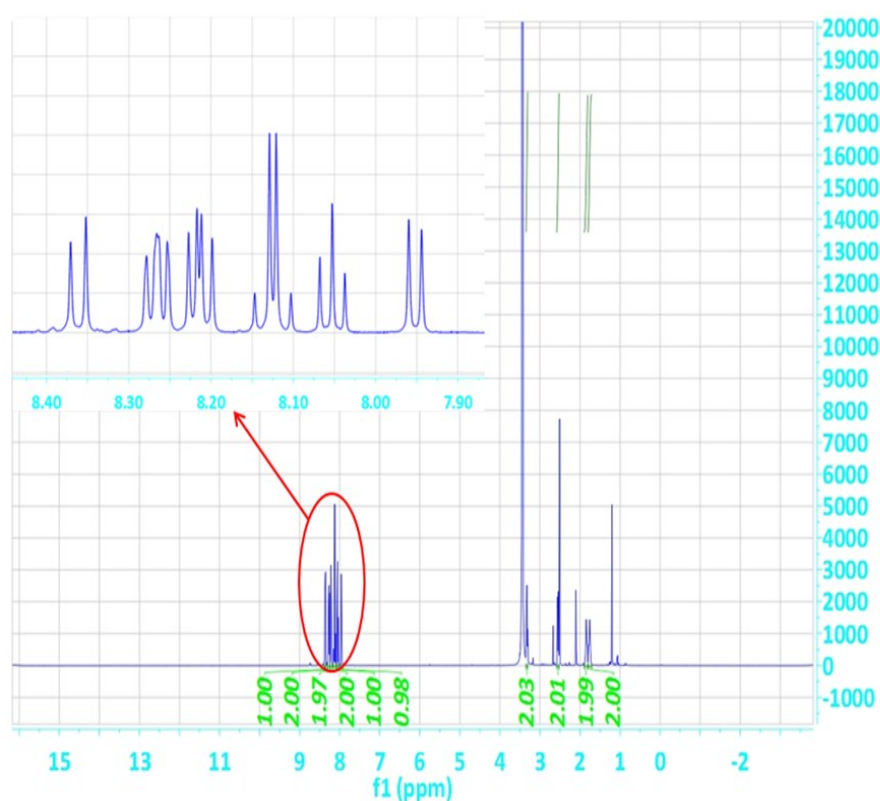

**Fig. S1**  $^1\text{H}$  NMR spectrum of PBSS ( $\text{DMSO}-d_6$ )

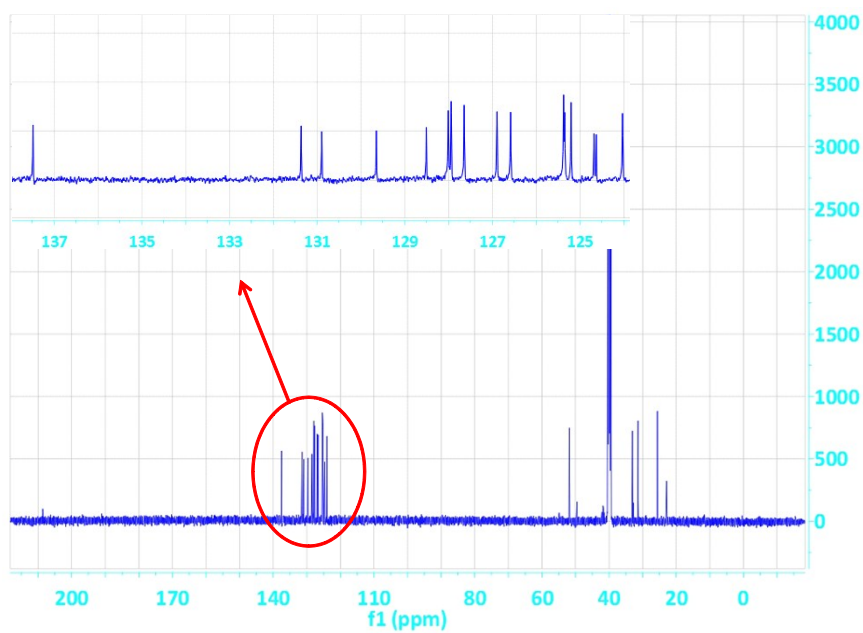

**Fig. S2**  $^{13}\text{C}$  NMR spectrum of PBSS ( $\text{DMSO-}d_6$ )

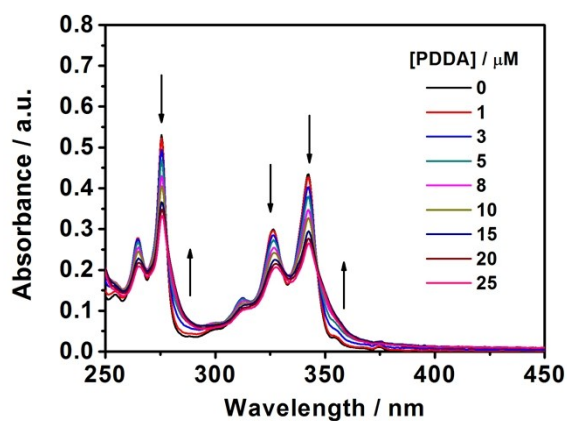

**Fig. S3** Absorption spectra of PBSS in the presence of different concentrations of PDDA in 10 mM Tris-HCl buffer (pH 7.4).

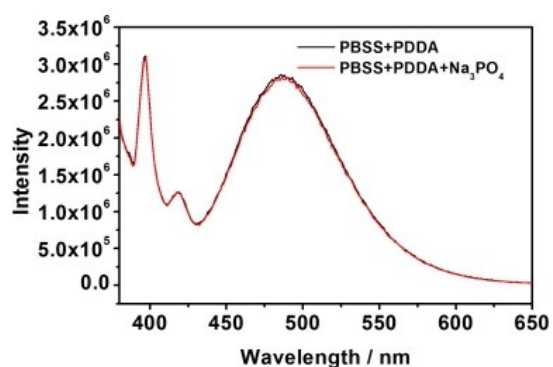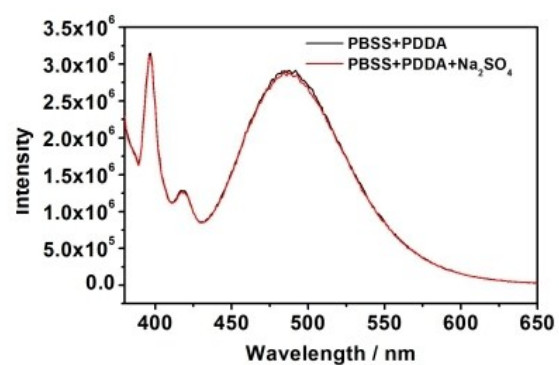

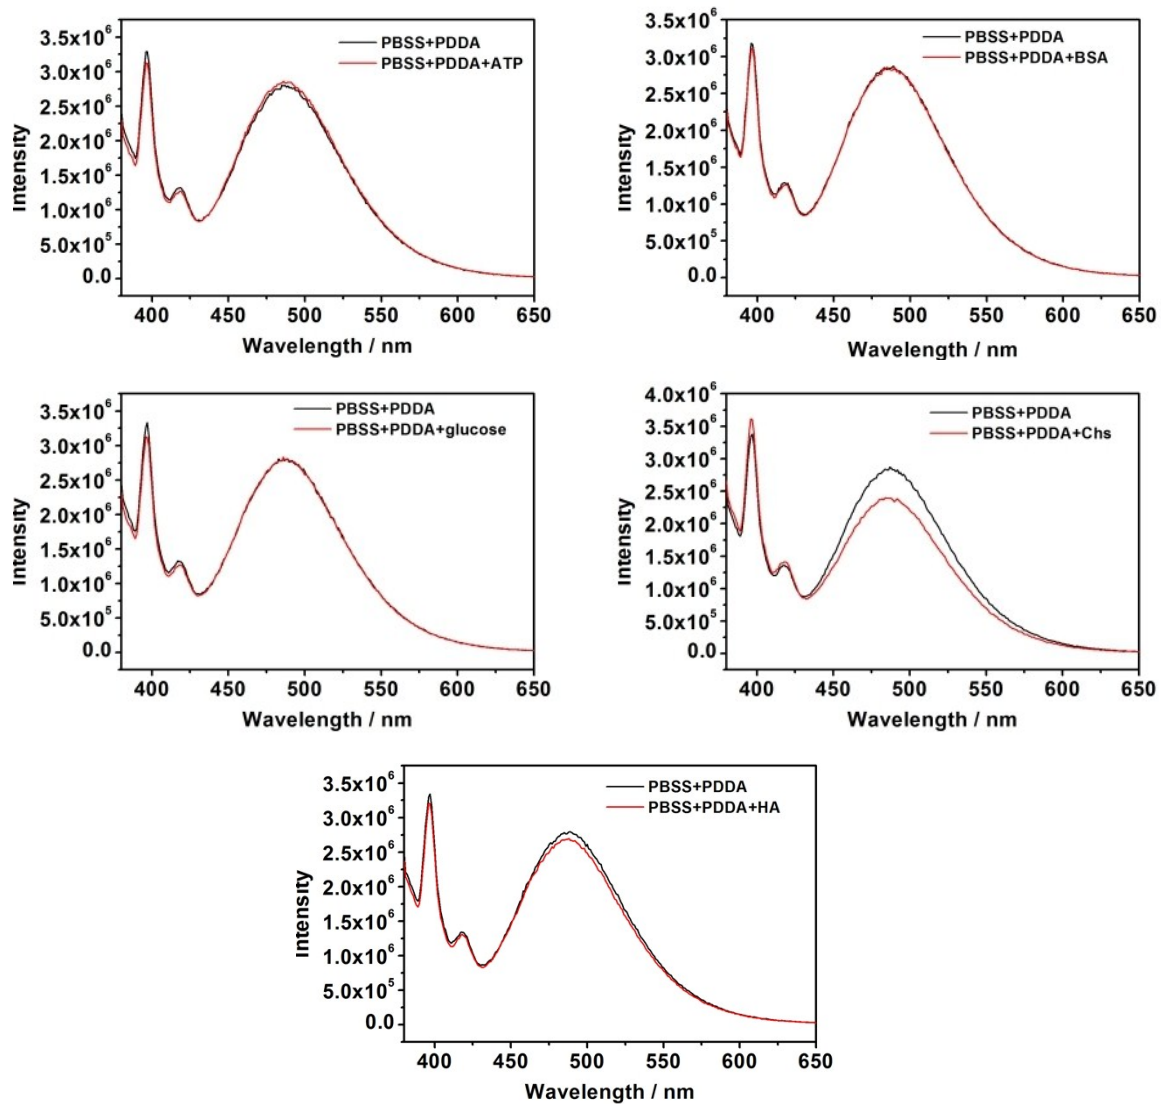

**Fig. S4** Emission spectra of PBSS/PDDA in the presence of various interferents in 10 mM Tris-HCl buffer (pH 7.4). [BSA] = 0.5  $\mu\text{g/mL}$ , [other interferents] = 3.0  $\mu\text{M}$ .  $\lambda_{\text{ex}}$  = 365 nm.
